# Supplementary material
Source: PubMed Central journal article supplement (PMC5785251)

**Figure 1S**

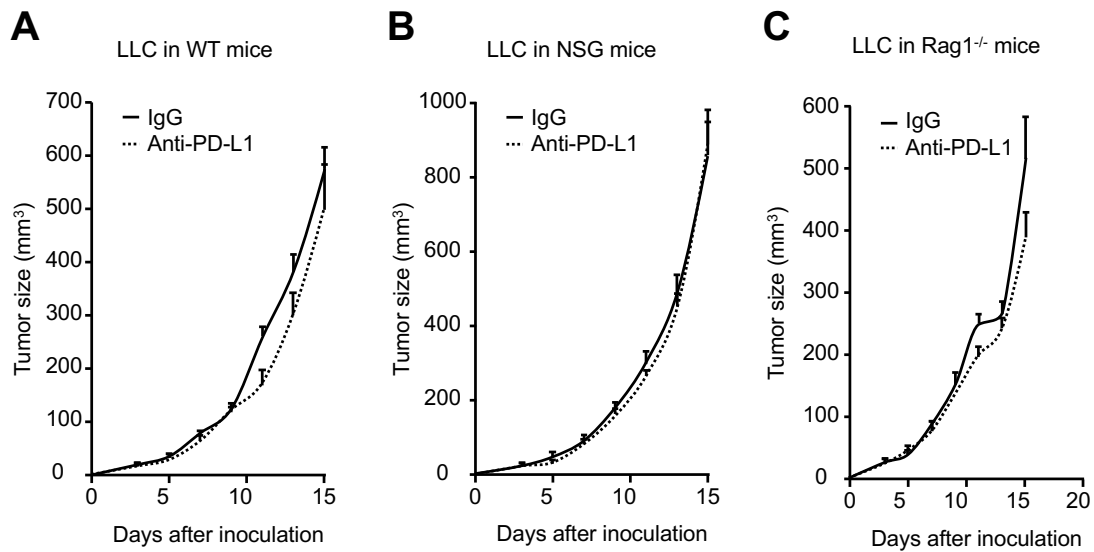

**Figure 2S**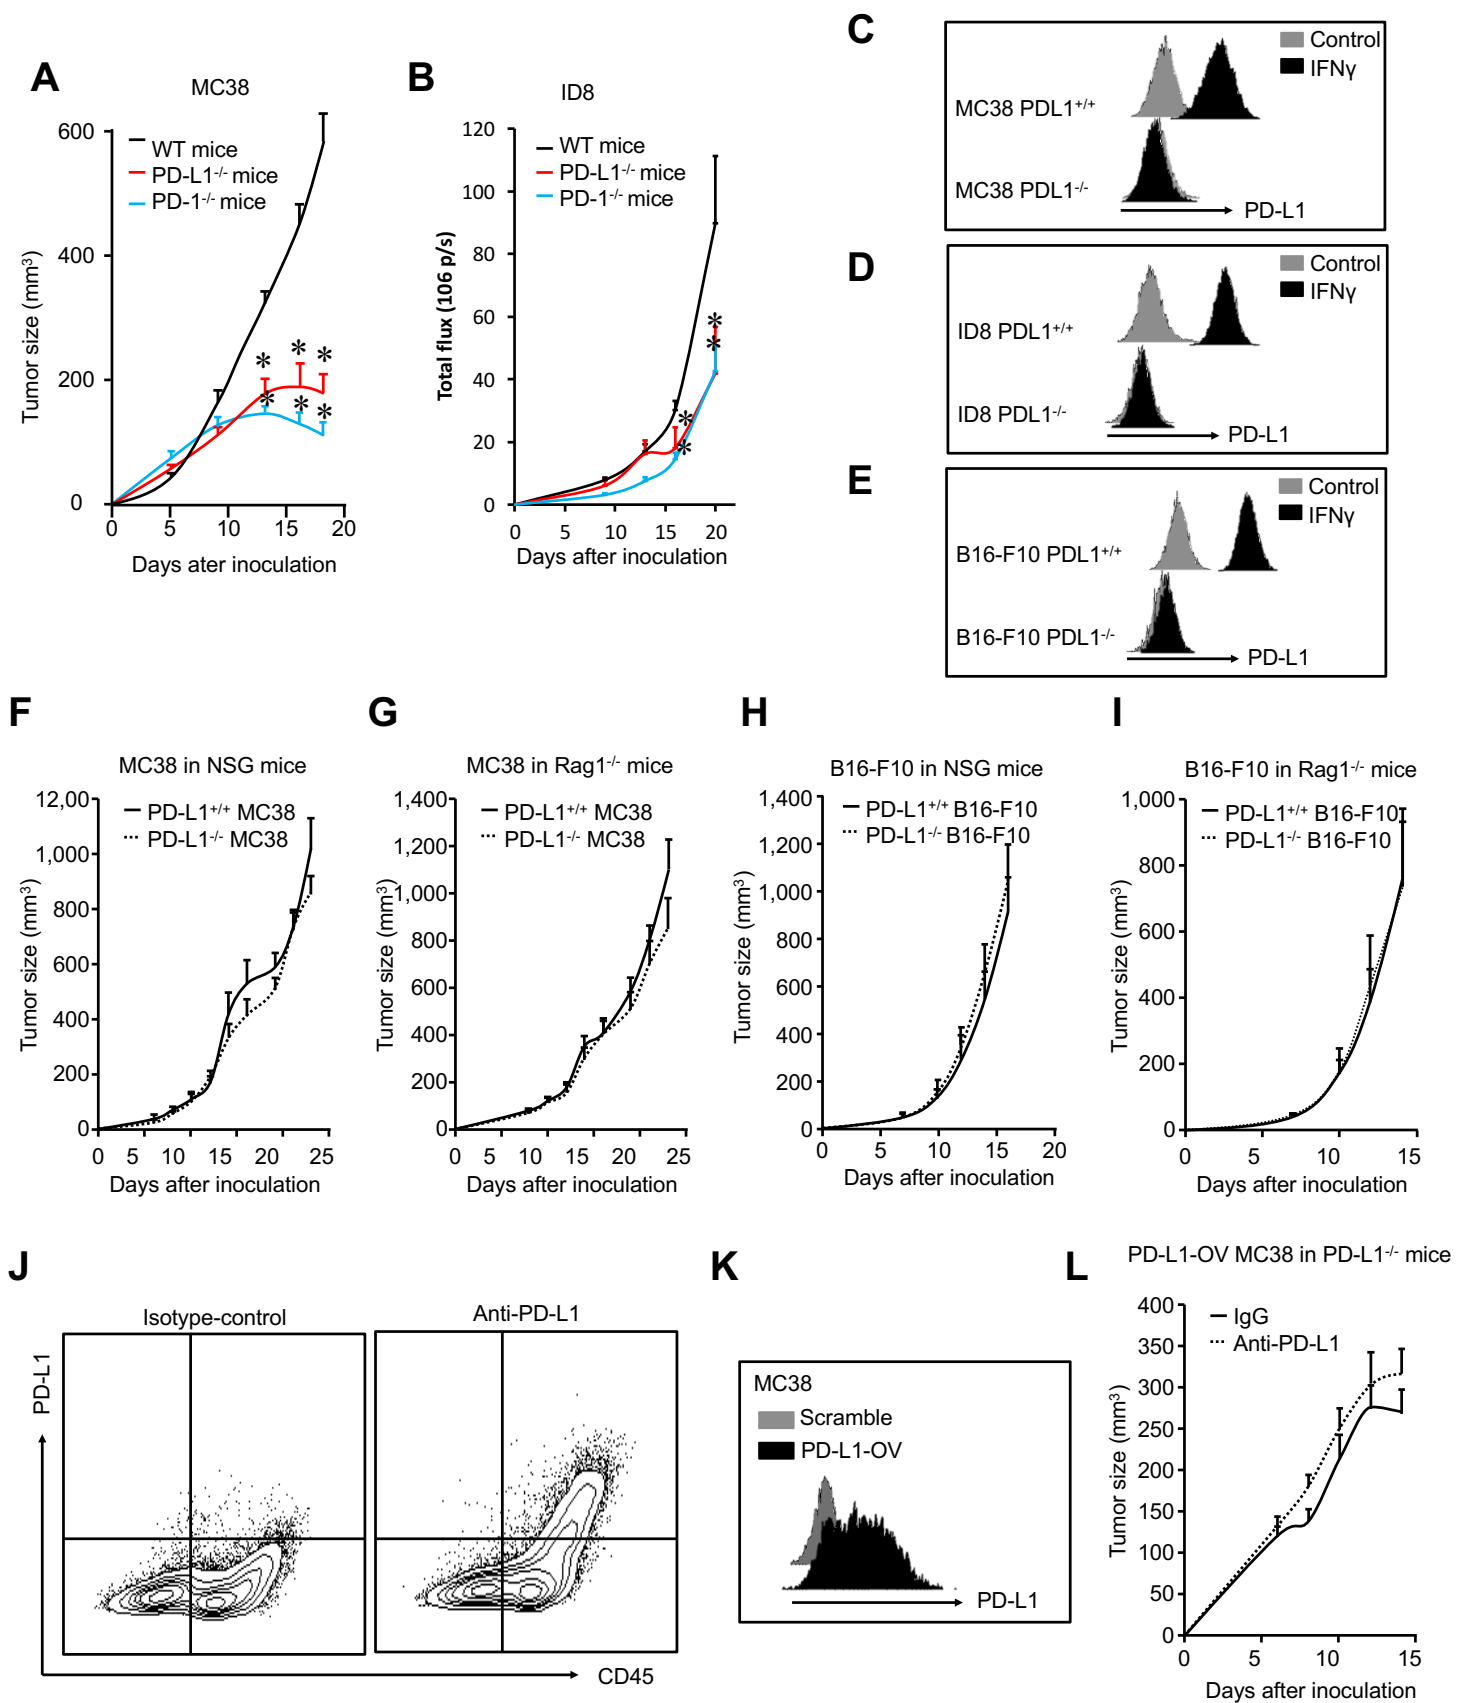

**Figure 3S**

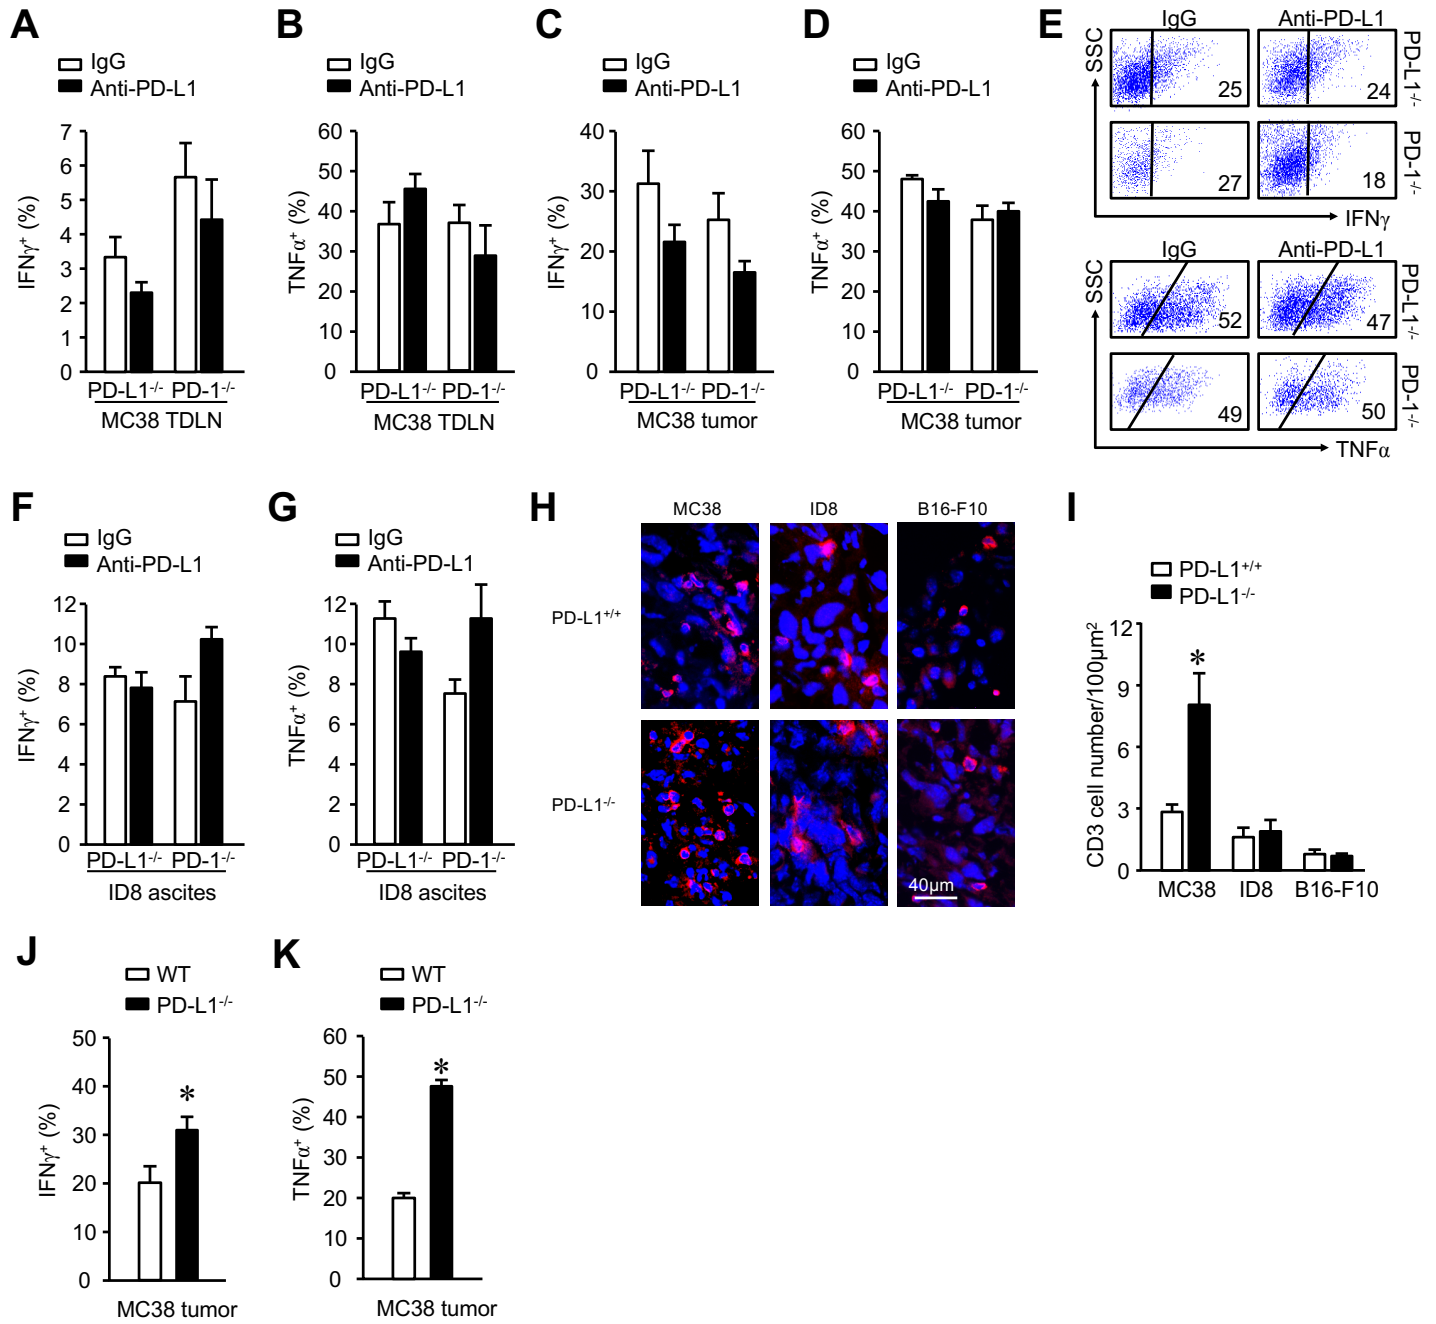

**Figure 4S**

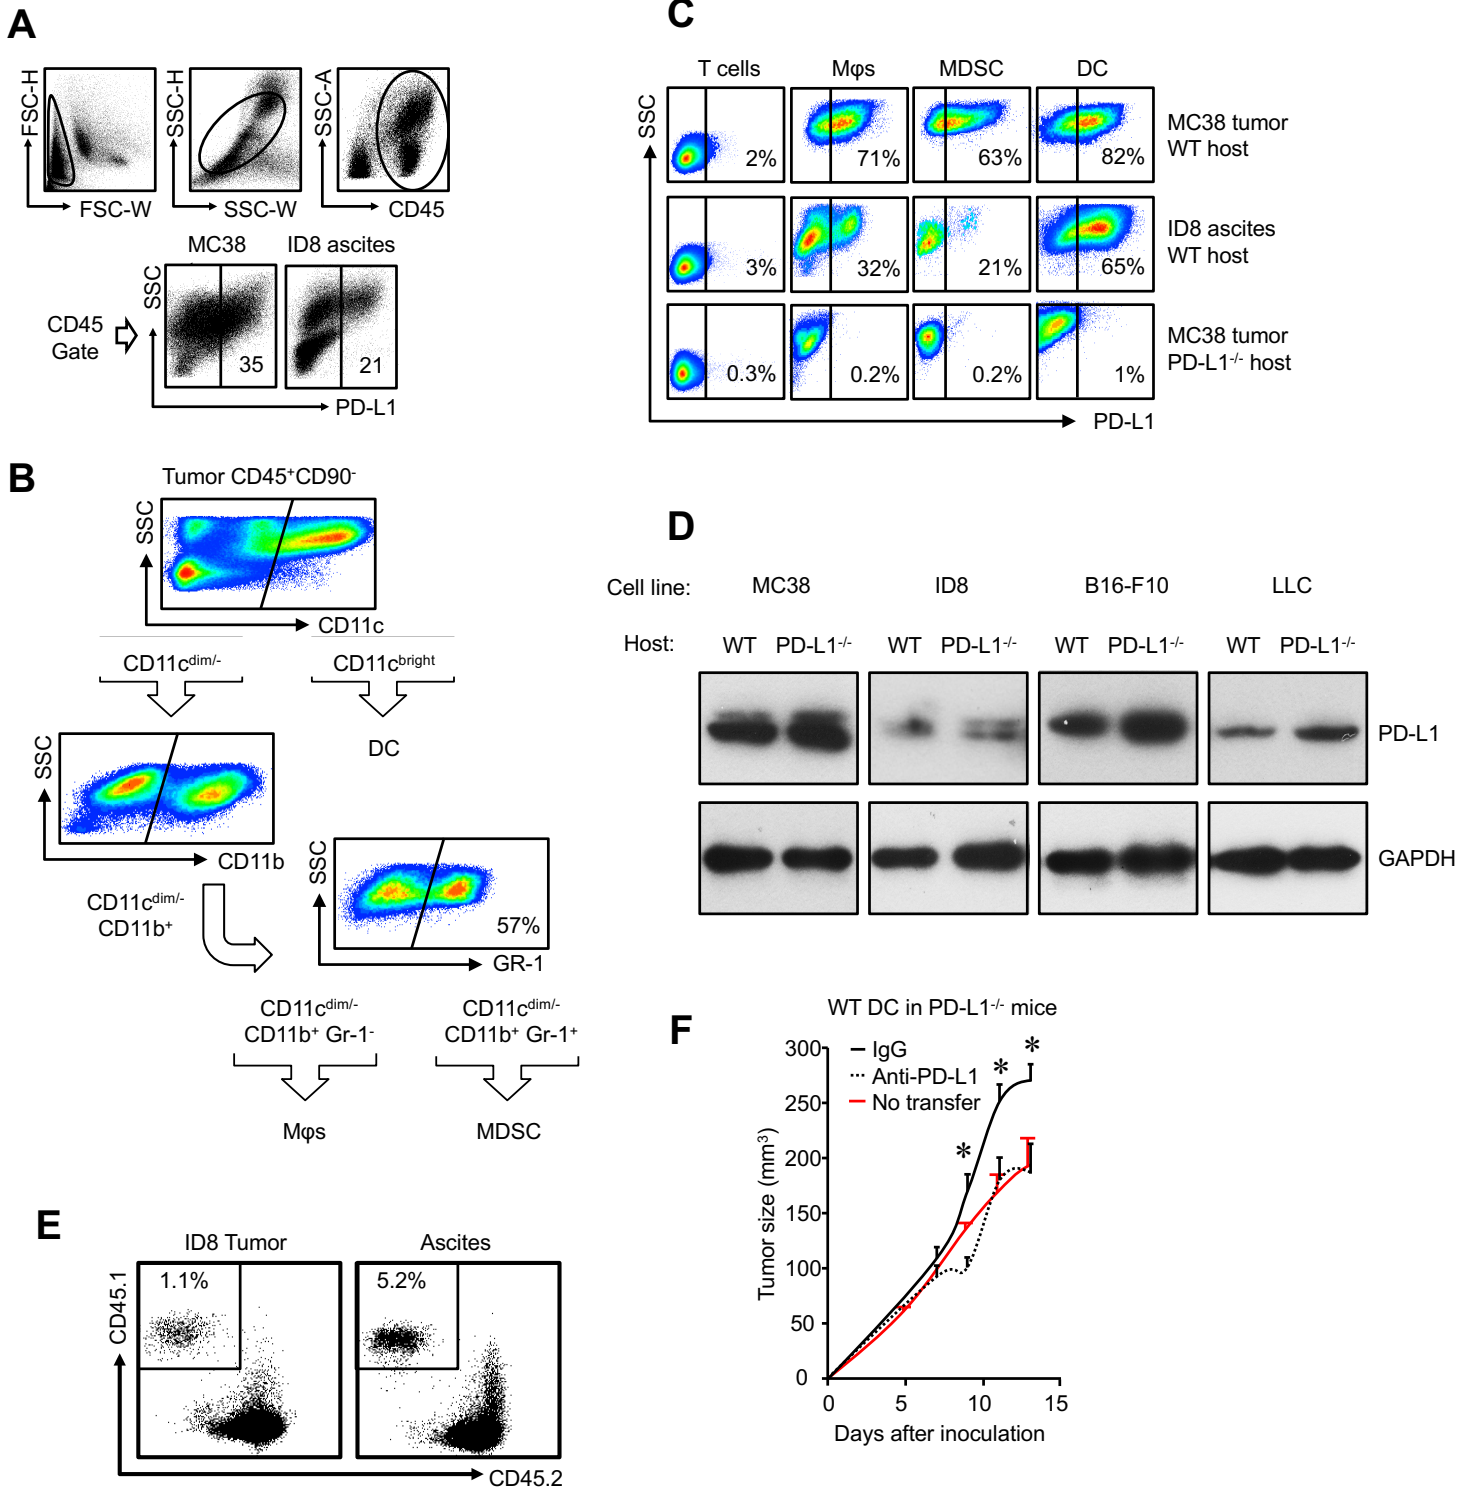

**Figure 5S**

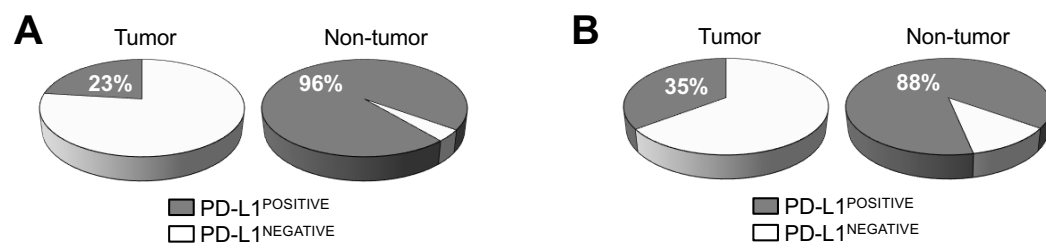

## Supplementary figure legends

### Figure S1. Effect of anti-PD-L1 treatment on LLC volume in mice.

(A-C) WT, NSG, and Rag1<sup>-/-</sup> mice were inoculated with LLC tumor cells. The mice were treated from day 3 every 3 days with anti-PD-L1 or isotype control (rlgG1). Tumor volume was monitored. n = 5-7. Wilcoxon test was used for two-way comparisons.

### Figure S2. Expression and effect of tumor PD-L1 on tumor growth.

(A-B) WT, PD-L1<sup>-/-</sup>, and PD-1<sup>-/-</sup> mice were inoculated with MC38 (A), and ID8 (B) tumor cells. Tumor volume was monitored. n = 5-7. T-test was used for two-way comparisons (\*P < 0.05). (C-E) CRISPR PD-L1 homozygous PD-L1 knockout (PD-L1<sup>-/-</sup>) tumor cell clones were made for MC38 (C), ID8 (D), and B16-F10 (E). PD-L1<sup>-/-</sup> and control tumor cells were stimulated for 48 hours with or without IFN $\gamma$  (10ng/ml). PD-L1 expression was analyzed by FACS. One of 4 experiments is shown. (F-I) PD-L1<sup>-/-</sup> MC38 (F, G), PD-L1<sup>-/-</sup> B16-F10 (H, I) and wild type control tumor cells were inoculated into NSG and Rag1<sup>-/-</sup> mice. Tumor load was monitored. n=5 mice per group. (J) PD-L1<sup>-/-</sup> MC38 cells were inoculated into wild type mice. Single cells were prepared from tumor tissues on day 15. PD-L1 expression was analyzed by FACS on CD45<sup>+</sup> immune cells and CD45<sup>-</sup> tumor cells. One of 5 is shown. (K-L) PD-L1 overexpressed (PD-L1-OV) or scrambled MC38 cells were analyzed for PD-L1 expression by FACS (K). PD-L1<sup>-/-</sup> mice were inoculated with PD-L1-OV MC38 cells (L, n = 8) and treated with anti-PD-L1 or isotype control (rlgG1). Tumor volume was monitored. Wilcoxon test was used for two-way comparisons. (\*P < 0.05).

### Figure S3. Effect of anti-PD-L1 on T cell effector cytokine expression.

(A-G) T cell effector cytokines were analyzed with intracellular staining in MC38 tumor draining lymph nodes (TDLN) (A, B), MC38 tumor tissues (C-E), and ID8 tumor ascites (F, G) in PD-L1<sup>-/-</sup> and PD-1<sup>-/-</sup> mice. Data are expressed as the mean  $\pm$  SEM (n = 3-5 per group). Representative original flow cytometry data are shown (E). (H, I) T cell infiltration was analyzed with immunofluorescence staining for CD3 in tumors from PD-L1<sup>+/+</sup> and PD-L1<sup>-/-</sup> mice. Data are expressed as the mean  $\pm$  SEM (I, n = 10 per group). Representative staining images are shown (H). T-test was used for two-way comparisons (\*P < 0.05). (J, K) T cell effector cytokines were analyzed with intracellular staining in MC38 tumor in WT and PD-L1<sup>-/-</sup> mice, n = 5. T-test was used for two-way comparisons (\*P < 0.05).

### Figure S4. APC subsets in tumor tissues and tumor PD-L1 expression *in vivo*.

(A-C) PD-L1 expression in tumor infiltrating immune cells. (A) PD-L1 expression on CD45<sup>+</sup> immune cells in MC38 tumor tissues. (B) FACS gating on different immune cell subsets in MC38 tumor tissues. Representative flow cytometry data showed gates on CD45<sup>+</sup>CD90<sup>-</sup> cells, DCs, macrophages, and MDSCs. (C) The percentages of PD-L1 expression in each immune cell subset in MC38 and ID8 ascites. One of five replicates is shown. (D) PD-L1 expression on tumor cells *in vivo*. Tumor cells were isolated from wild type and PD-L1<sup>-/-</sup> mice. PD-L1 expression was detected by Western blots in tumor cells. Experiments were performed in triplicates; representative replicate is shown. (E) CD45.1<sup>+</sup> peritoneal APCs were injected into ID8 tumor bearing CD45.2<sup>+</sup> mice. 48 hours after APC injection, CD45.1<sup>+</sup> APCs were examined in ID8 tumor tissues and ascites by flow cytometry. n = 5. (F) MC38 tumor bearing PD-L1<sup>-/-</sup> mice were adoptively transferred with (black) or without (red) WT DCs. Mice were treated with anti-PD-L1 or isotype IgG1. Tumor volume was monitored. Wilcoxon test was used for two-way comparisons (n = 7, \*P < 0.05).

**Figure S5. PD-L1<sup>+</sup> APCs and tumor cells in patients with melanoma and ovarian cancer.**

(A-B) Percentages of patients with PD-L1<sup>+</sup> tumor cells or PD-L1<sup>+</sup> non-tumor cells were shown in melanoma (A) and ovarian cancer (B) tissues.

**Supplementary Table 1. Characteristics of melanoma patients and PD-L1 expression pattern**

| Patient | Gender | Response | tissue type                    | Tumor        | Non-tumor  |       | (%) |    |
|---------|--------|----------|--------------------------------|--------------|------------|-------|-----|----|
|         |        |          |                                |              | positivity | score | mDC | MQ |
| 1       | M      | CR       | sinus primary                  | negative     | Positive   | 4     | 50  | 30 |
| 2       | M      | CR       | lymph node metastasis          | single cells | Positive   | 3     | 20  | 0  |
| 3       | M      | CR       | skin primary                   | negative     | Positive   | 3     | 5   | 10 |
| 4       | M      | CR       | subcutaneous metastasis        | negative     | Positive   | 3     | 20  | 5  |
| 5       | M      | CR       | lymph node metastasis          | negative     | Positive   | 3     | 50  | 5  |
| 6       | F      | CR       | lymph node metastasis          | negative     | Positive   | 4     | 20  | 50 |
| 7       | F      | CR       | skin primary                   | positive     | Positive   | 3     | 30  | 20 |
| 8       | M      | CR       | lymph node metastasis          | negative     | Positive   | 4     | 50  | 50 |
| 9       | M      | CR       | lymph node metastasis          | single cells | Positive   | 3     | 20  | 40 |
| 10      | M      | CR       | skin primary                   | single cells | Positive   | 4     | 50  | 40 |
| 11      | M      | PR       | sinus metastasis               | negative     | Positive   | 2     | 20  | 0  |
| 12      | M      | PR       | brain metastasis               | negative     | Positive   | 1     | 1   | 5  |
| 13      | M      | PR       | subcutaneous metastasis        | negative     | Positive   | 3     | 30  | 20 |
| 14      | M      | PR       | soft tissue metastasis         | negative     | Positive   | 1     | 5   | 1  |
| 15      | M      | PR       | lymph node metastasis          | negative     | Positive   | 2     | 20  | 10 |
| 16      | F      | PR       | skin primary                   | negative     | Positive   | 1     | 1   | 10 |
| 17      | F      | SD       | uvea primary                   | negative     | Positive   | 3     | 50  | 10 |
| 18      | M      | SD       | skin primary                   | positive     | Positive   | 1     | 5   | 1  |
| 19      | M      | SD       | lymph node metastasis          | negative     | Positive   | 3     | 30  | 30 |
| 20      | M      | SD       | soft tissue metastasis         | positive     | Positive   | 1     | 1   | 1  |
| 21      | F      | SD       | lymph node metastasis          | negative     | Positive   | 3     | 20  | 50 |
| 22      | M      | PD       | lymph node metastasis          | negative     | Positive   | 2     | 5   | 0  |
| 23      | F      | PD       | lymph node metastasis          | negative     | Positive   | 2     | 30  | 20 |
| 24      | F      | PD       | skin/vulvar primary            | negative     | negative   | 0     | 0   | 0  |
| 25      | M      | PD       | lung metastasis                | negative     | Positive   | 1     | 1   | 1  |
| 26      | F      | PD       | dermal/subcutaneous metastasis | negative     | Positive   | 1     | 1   | 1  |



**Supplementary Table 2. Characteristics of ovarian cancer patients and PD-L1 expression pattern**

| Patient | Gender | Response | Tumor    | Non-tumor  |       | (%) |    |
|---------|--------|----------|----------|------------|-------|-----|----|
|         |        |          |          | positivity | score | mDC | MQ |
| 1       | F      | CR       | Negative | Positive   | 4     | 20  | 50 |
| 2       | F      | CR       | Negative | Positive   | 3     | 10  | 20 |
| 3       | F      | PR       | Negative | Positive   | 4     | 40  | 40 |
| 4       | F      | SD       | Positive | Positive   | 4     | 10  | 20 |
| 5       | F      | SD       | Negative | Positive   | 2     | 1   | 10 |
| 6       | F      | SD       | Negative | Positive   | 4     | 40  | 50 |
| 7       | F      | SD       | Negative | Positive   | 2     | 1   | 10 |
| 8       | F      | SD       | Negative | Positive   | 2     | 10  | 5  |
| 9       | F      | PD       | Positive | Positive   | 3     | 20  | 40 |
| 10      | F      | PD       | Negative | Positive   | 1     | 1   | 1  |
| 11      | F      | PD       | Negative | Positive   | 2     | 5   | 5  |
| 12      | F      | PD       | Positive | Negative   | 0     | 0   | 0  |
| 13      | F      | PD       | Positive | Negative   | 0     | 0   | 0  |
| 14      | F      | PD       | Negative | Positive   | 2     | 5   | 5  |
| 15      | F      | PD       | Negative | Positive   | 2     | 5   | 5  |
| 16      | F      | PD       | Positive | Positive   | 2     | 5   | 10 |
| 17      | F      | PD       | Negative | Positive   | 2     | 5   | 1  |

B5H1  
Tissue

1

Fig S4D. Anti-PD-L1

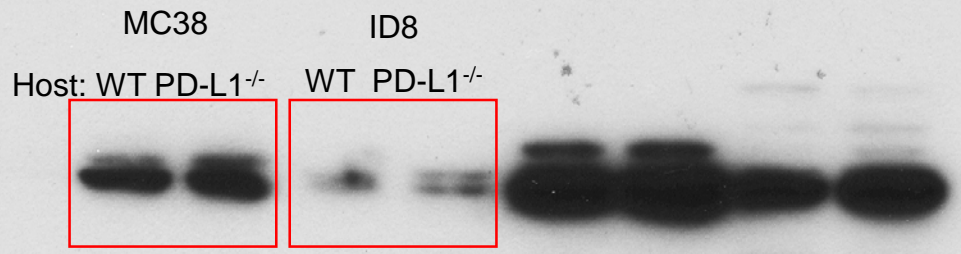

3  
1

PD-L1<sup>-/-</sup> cell line  
→

Fig S4D. Anti-PD-L1 B16-F10

Host: WT PD-L1<sup>-/-</sup>

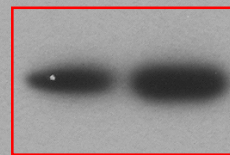

Fig S4D. Anti-PD-L1 LLC

LLC

Host: WT PD-L1<sup>-/-</sup>

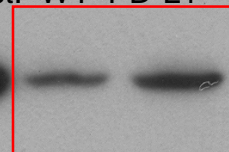

1  
B16-F10

2  
LLC

3  
control

Fig S4D. Anti-GAPDH

B16-F10

Host: WT PD-L1<sup>-/-</sup>

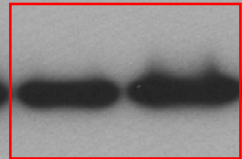

2 GAPDH  
- 11.3  
tissue #

MC38

ID8

LLC

Host: WT PD-L1<sup>-/-</sup>

Host: WT PD-L1<sup>-/-</sup>

Host: WT PD-L1<sup>-/-</sup>

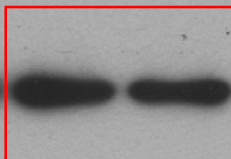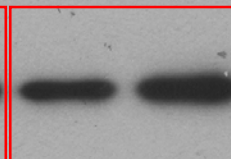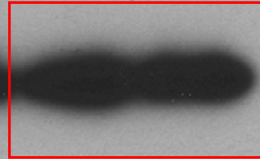

4  
- 2#

6 cell line

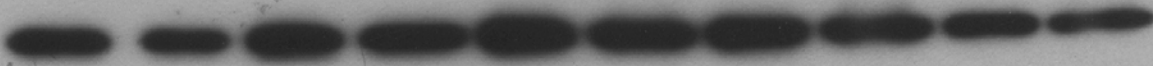

Supplement: jci-128-96113-s001.pdf [file jci-128-96113-s001.pdf]
